# Supplementary material for: The Pyrazolo[3,4-d]pyrimidine Derivative, SCO-201, Reverses Multidrug Resistance Mediated by ABCG2/BCRP
Source: PubMed Central journal article supplement (PMC7140522; doi:10.3390/cells9030613), 2020-03-04
Supplement: cells-09-00613-s001.pdf [file cells-09-00613-s001.pdf]

1 Article

2 **Supplementary Materials:**  
 3 **The Pyrazolo[3,4-d]pyrimidine Derivative, SCO-201,**  
 4 **Reverses Multidrug Resistance Mediated by**  
 5 **ABCG2/BCRP**

6 **Sophie E. B. Ambjørner<sup>1</sup>, Michael Wiese<sup>2</sup>, Sebastian Köhler<sup>2</sup>, Joen Svindt<sup>3</sup>, Xamuel Loft Lund<sup>1</sup>,**  
 7 **Michael Gajhede<sup>1</sup>, Lasse Saaby<sup>4</sup>, Birger Brodin<sup>4</sup>, Steffen Rump<sup>5</sup>, Henning Weigt<sup>6</sup>, Nils Brünner<sup>1,7</sup>,**  
 8 **Jan Stenvang<sup>1,7,\*</sup>**

10 <sup>1</sup> Department of Drug Design and Pharmacology, University of Copenhagen, Copenhagen, Denmark;  
 11 sophie.ambjoerner@gmail.com (S.A.); lxs184@alumni.ku.dk (X.L.L.); mig@sund.ku.dk (M.G.)

12 <sup>2</sup> Pharmaceutical Institute, University of Bonn, Bonn, Germany; mwiese@uni-bonn.de (M.W.);  
 13 skoehler@uni-bonn.de (S.K.)

14 <sup>3</sup> Department of Biology, University of Copenhagen, Copenhagen, Denmark; joen.svindt@gmail.com (J.S)

15 <sup>4</sup> Department of Pharmacy, University of Copenhagen, Copenhagen, Denmark; lasse.saaby@sund.ku.dk  
 16 (L.S.); birger.brodin@sund.ku.dk (B.B.)

17 <sup>5</sup> SRConsulting, Sehnde, Germany; rump@s-r-consulting.com (S.R.)

18 <sup>6</sup> Division of Chemical Safety and Toxicity, Fraunhofer Institute of Toxicology and Experimental  
 19 Medicine, Hannover, Germany; henning.weigt@item.fraunhofer.de (H.W.)

20 <sup>7</sup> Scandion Oncology A/S, Symbion, Copenhagen, Denmark; js@scandiononcology.com (J.S.);  
 21 nb@scandiononcology.com (N.B.)

22 \* Correspondence: js@scandiononcology.com; Tel: +45 60-777-678

23 Received: date; Accepted: date; Published: date

25

26

27

28

29

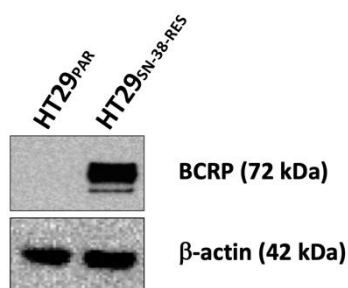

30

**Figure S1:** Western blot analysis of BCRP expression in SN-38 sensitive and SN-38 resistant HT29 cells.  $\beta$ -actin was used as loading control.

31

32

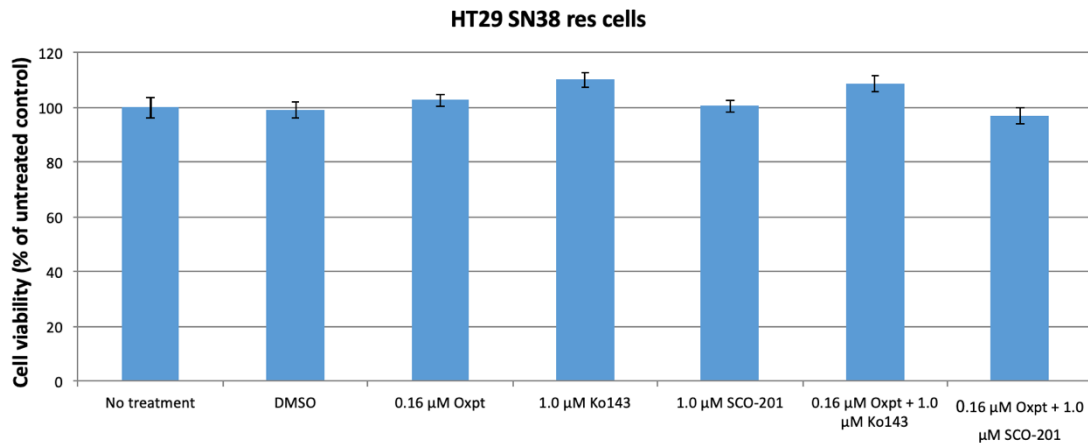

33  
34  
35  
36  
37  
38

**Figure S2:** Cell viability assay with HT29 SN38 resistant colon cancer cells. Cells were incubated for 72 hours with the indicated concentrations of drugs. It is seen that the combination of neither SCO-201 or Ko143 with oxaliplatin (which is not a substrate for BCRP) has any combinatorial effect on the cell viability in the tested concentrations. A representative example is shown. Error bars indicate standard deviations.

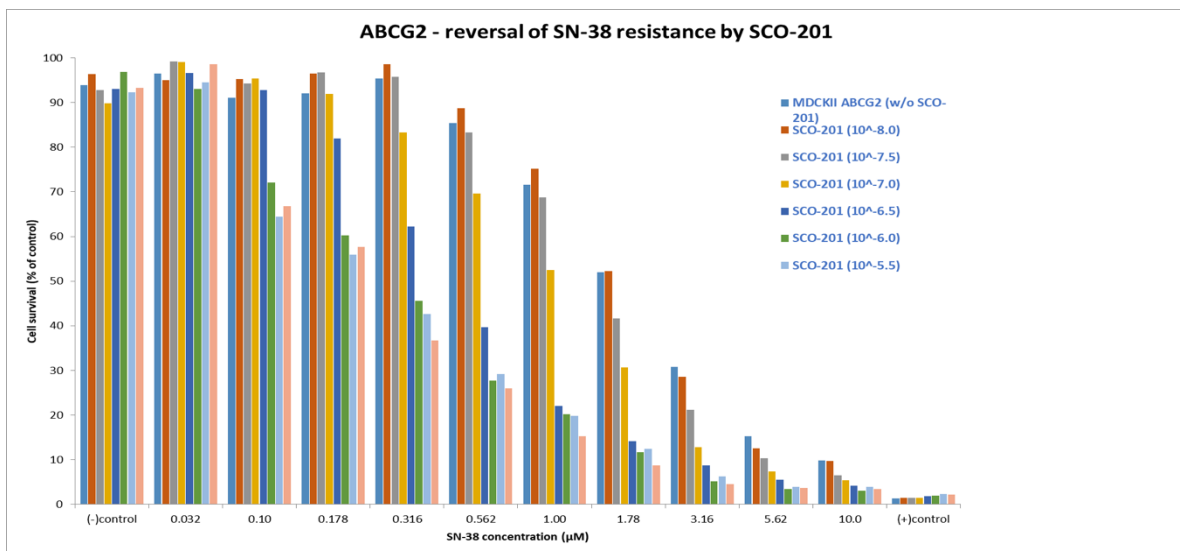

39  
40  
41  
42  
43

**Figure S3:** Cell viability assay with mitoxantrone-resistant MDCKII-ABCG2/BCRP cells. Cells were incubated for 72 hours with the indicated concentrations of drugs. It is seen that the cell viability is reduced in a dose-dependent manner by SN38 in dose-dependent manner.

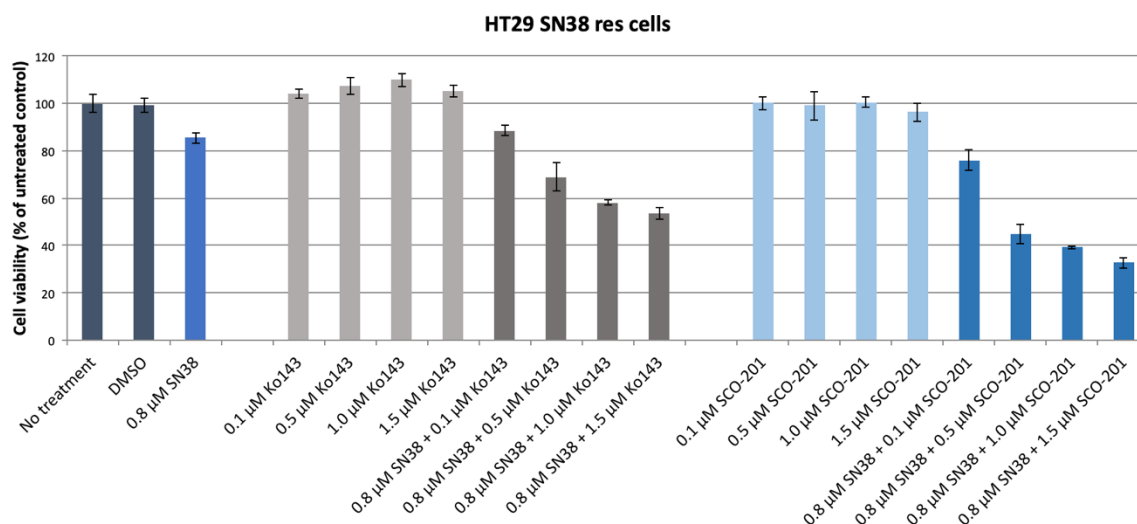

44

45 **Figure S4:** Cell viability assay with HT29 SN38 resistant colon cancer cells. Cells were incubated for  
 46 72 hours with the indicated concentrations of drugs. It is seen that the combination of both SCO-201  
 47 or Ko143 with SN38 has a combinatorial effect on the cell viability. It is also shown that SCO-201 is  
 48 more potent than Ko14 in restoring the effect of SN38 in the SN38 resistant cells. A representative  
 49 example is shown. Error bars indicate standard deviations.

50

51

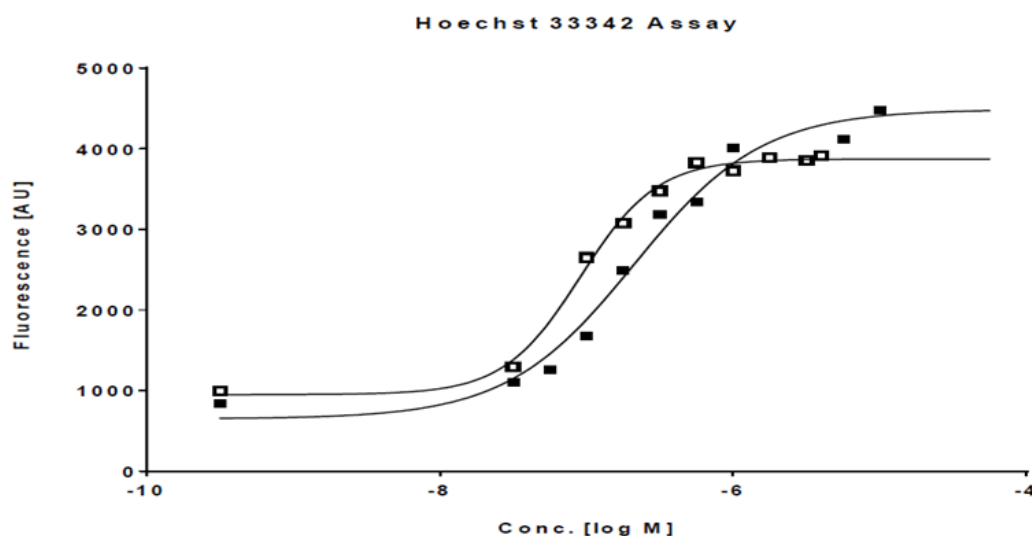

52

53 **Figure S5:** Comparison of ABCG2 (BCRP) inhibition by SCO-201 and Ko143 as determined in the  
 54 Hoechst 33342 accumulation assay in MDCK cells. Open and closed squares indicate SCO-201 and  
 55 Ko143, respectively. For comparative purposes, the potent and selective ABCG2 inhibitor Ko143,  
 56 which is described in the literature as a standard inhibitor for potency assessment of new compounds,  
 57 was used as a comparator. Different concentrations of SCO-201 and Ko143 in a logarithmic scale were  
 58 tested and fluorescence values in the steady state measured for each concentration. The IC<sub>50</sub>-values  
 59 for SCO-201 and Ko143 were 0.175 (± 0.077) μM and 0.250 (± 0.106) μM, respectively. Thus, the  
 60 inhibitory potential of SCO-201 on ABCG2 (BCRP) was higher compared to the standard inhibitors  
 61 Ko143. A representative experiment is depicted.

62

63

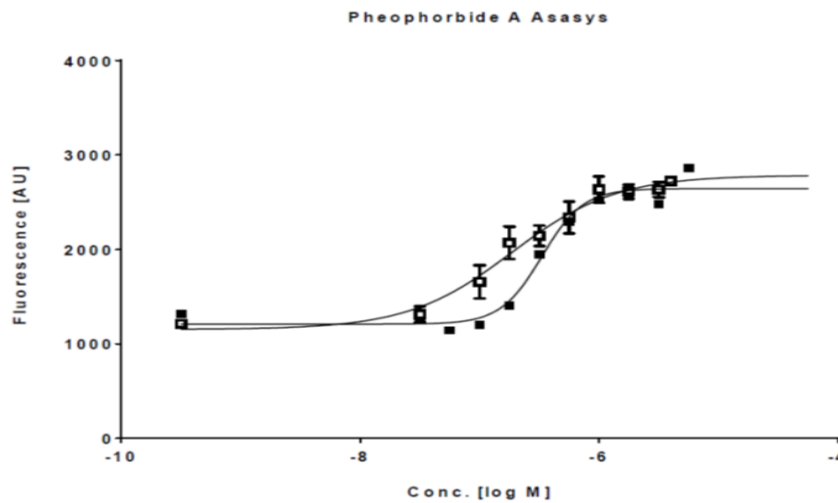

64 **Figure S6:** Comparison of SCO-201 and Ko143 as determined in the Pheophorbide A accumulation  
 65 assay in MDCK cells. Open and closed squares indicate SCO-201 and Ko143, respectively. For  
 66 comparative purposes, the potent and selective ABCG2 inhibitor Ko143, which is described in the  
 67 literature as a standard inhibitor for potency assessment of new compounds, was used as a  
 68 comparator. Different concentrations of SCO-201 and Ko143 in a logarithmic scale were tested and  
 69 intra cellular fluorescence values in the steady state measured by flow cytometry for each  
 70 concentration. IC<sub>50</sub> value of SCO-201 in the pheophorbide A accumulation assay was determined for  
 71 SCO-201 and Ko143 to 0.145 μM (±0.040 μM) and 0.231 (± 0.102) μM, respectively. Thus, the inhibitory  
 72 potential of SCO-201 was higher compared to the standard inhibitors Ko143. A representative  
 73 experiment is depicted.

| Compound I.D.                                                  | Client Compound I.D. | IC <sub>50</sub> (M) | nH  | Test Concentration | % of Control Values |                 |      |
|----------------------------------------------------------------|----------------------|----------------------|-----|--------------------|---------------------|-----------------|------|
|                                                                |                      |                      |     |                    | 1 <sup>st</sup>     | 2 <sup>nd</sup> | Mean |
| <b>BCRP (h) inhibition (BCRP-CHO, Hoechst 33342 substrate)</b> |                      |                      |     |                    |                     |                 |      |
| 100014197-1                                                    | OBR-5-340            | 1.7E-06 M            | 0.4 | 3.0E-08 M          | 94.2                | 95.2            | 94.7 |
|                                                                |                      |                      |     | 1.0E-07 M          | 83.7                | 84.9            | 84.3 |
|                                                                |                      |                      |     | 3.0E-07 M          | 64.8                | 63.3            | 64.1 |
|                                                                |                      |                      |     | 1.0E-06 M          | 45.3                | 42.3            | 43.8 |
|                                                                |                      |                      |     | 3.0E-06 M          | 39.3                | 41.4            | 40.4 |
|                                                                |                      |                      |     | 1.0E-05 M          | 30.0                | 31.8            | 30.9 |
|                                                                |                      |                      |     | 3.0E-05 M          | 26.5                | 25.9            | 26.2 |
|                                                                |                      |                      |     | 1.0E-04 M          | 27.4                | 23.5            | 25.4 |

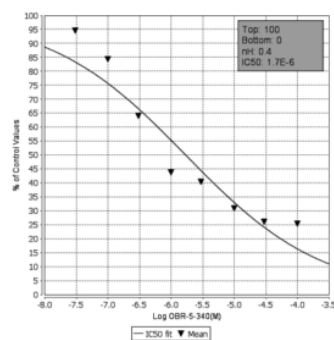

Figure X. OBR-5-340 on BCRP (h) inhibition (BCRP-CHO, Hoechst 33342 substrate)

77 **Figure S7:** SCO-201 (OBR-5-340) mediated inhibition of BCRP. A dye efflux assay employing the  
 78 BCRP substrate Hoechst 33342 in BCRP overexpressing CHO cells determined the IC<sub>50</sub> of SCO-201 to  
 79 1.7 μM.  
 80

81

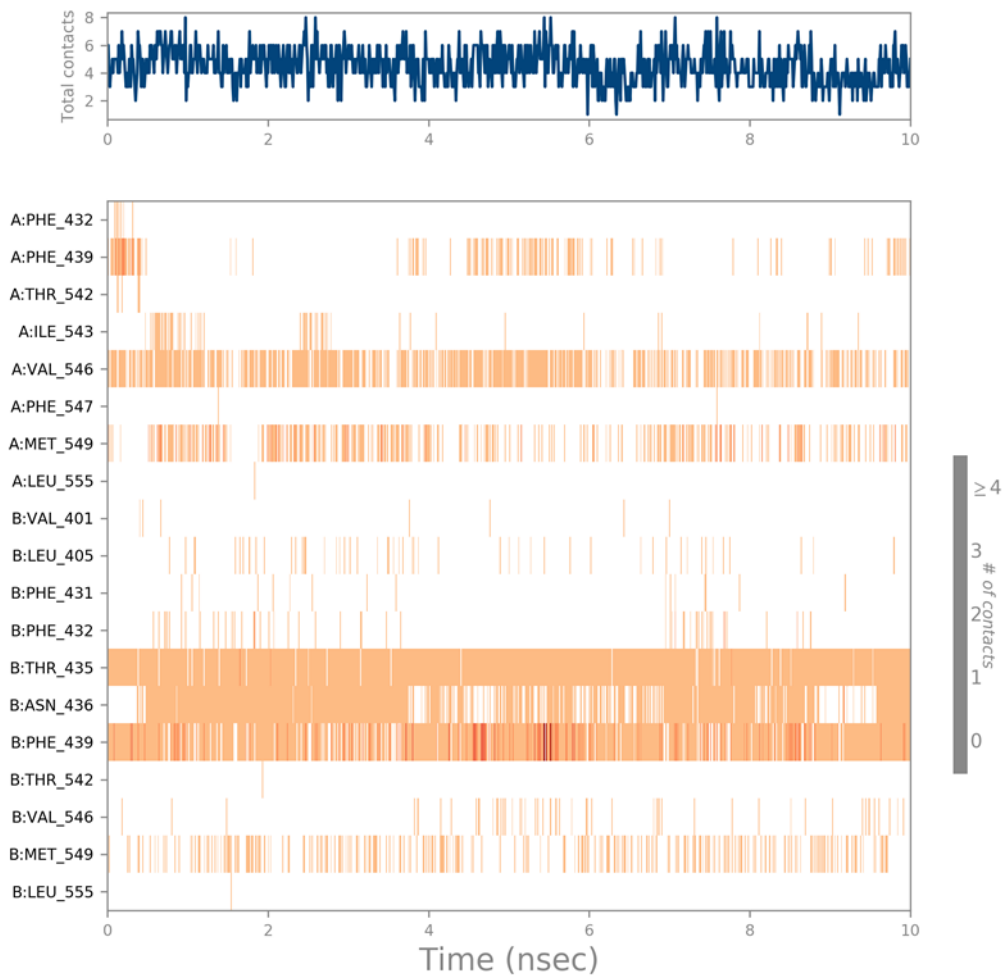

82

83 **Figure S8:** Timeline representation of interaction and contacts between residues in the  
 84 binding cavity of the BCRP transporter and SCO-201. Interactions (hydrogen bonds, hydrophobic,  
 85 ionic and water bridges) are shown over the simulation time. Residues which make more than one  
 86 interaction or contact with the ligand are shown as a darker shade of orange. From the timeline it  
 87 could be seen that SCO-201 interacts heavily with PHE-439 of the B chain. Further it shows that THR-  
 88 435 and ASN-436 of the protein B chain interacts with SCO-201 and to a minor extent VAL-546 of the  
 89 A chain of the transporter also interacts with the ligand through most of the simulation. Blue bar in  
 90 the top of the figure shows the total number of interactions between ligand and transporter at a given  
 91 time. Representation produced using Desmond, Schrödinger 2019-3, LLC [1].

92

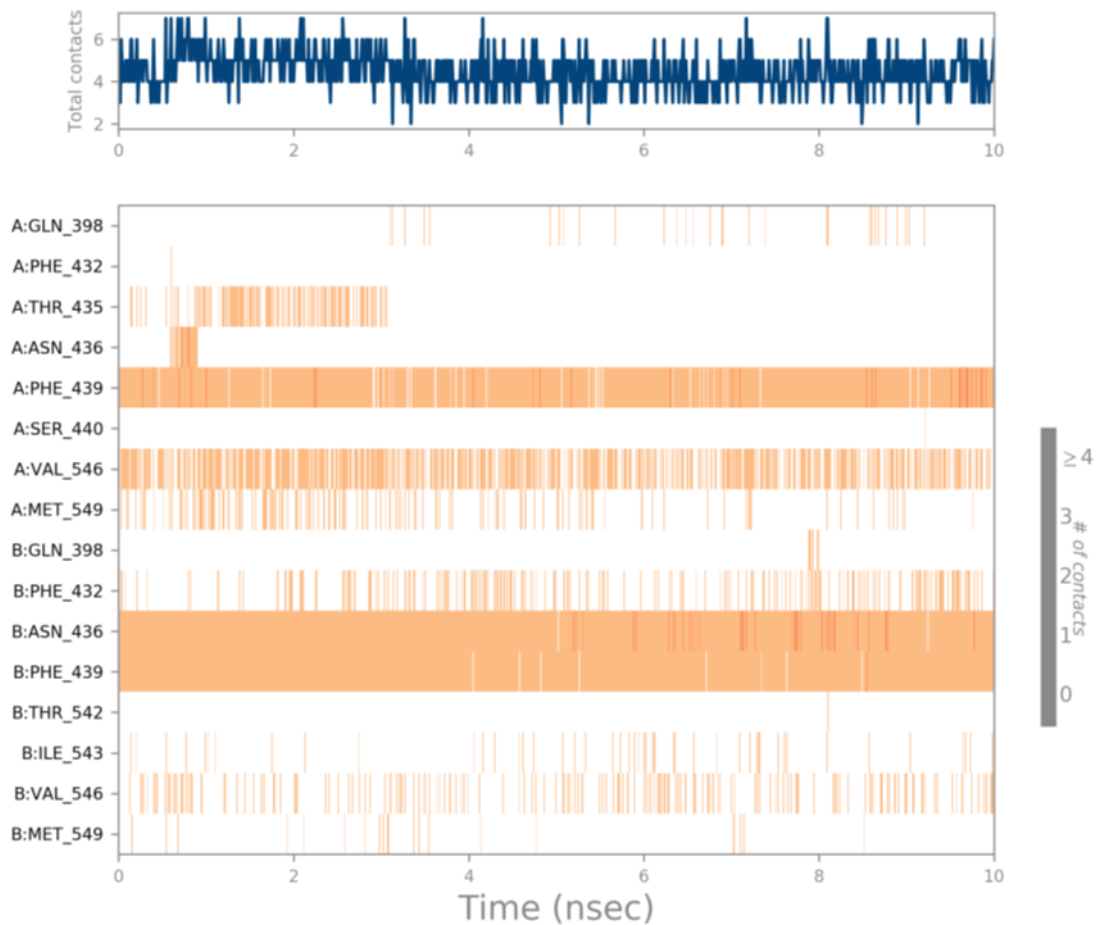

93

94

95

**Figure S9:** Timeline representation of interaction and contacts between residues in the binding cavity of the BCRP transporter and SN-38. Interactions (hydrogen bonds, hydrophobic, ionic and water bridges) are shown over the simulation time. Residues which make more than one interaction or contact with the ligand are shown as a darker shade of orange. From the timeline it could be seen that SN-38 interacts heavily with PHE-439 of both protein chains as well as ASN-436 from protein chain B. VAL-546 of the proteins chain A also interact with the substrate throughout most of the simulation. Blue bar in the top of the figure shows the total number of interactions between ligand and transporter at a given time.

103

104

105

106

107

108

109

110

**Table S1.** In vitro DMPK analysis of transporter inhibition

| Transporter | Cell line   | Substrate                | Reference inhibitor |
|-------------|-------------|--------------------------|---------------------|
| P-gp        | MDR1-MDCKII | Calcein AM               | Verapamil           |
| BCRP        | BCRP-CHO    | Hoechst 33342            | Ko143               |
| OATP1B1     | OATP1B1-CHO | Fluorescein methotrexate | Rifampicin          |
| OATP1B3     | OATP1B3-CHO | Fluorescein methotrexate | Rifampicin          |
| OAT1        | OAT1-CHO    | 6-carboxyfluorescein     | Probenecid          |
| OAT3        | OAT3-CHO    | 6-carboxyfluorescein     | Probenecid          |
| OCT2        | OCT2-CHO    | ASP+                     | Verapamil           |

| Reference Compound                                             | IC <sub>50</sub> (M) | nH  |
|----------------------------------------------------------------|----------------------|-----|
| <b>OCT2 (h) inhibition (OCT2-CHO, ASP+ substrate)</b>          |                      |     |
| verapamil                                                      | 8.3E-06 M            | 0.5 |
| <b>BCRP (h) inhibition (BCRP-CHO, Hoechst 33342 substrate)</b> |                      |     |
| KO143                                                          | 5.5E-08 M            | 0.5 |
| <b>OAT1 (h) inhibition (OAT1-CHO, CF substrate)</b>            |                      |     |
| Probenecid                                                     | 3.8E-05 M            | 0.8 |
| <b>OAT3 (h) inhibition (OAT3-CHO, CF substrate)</b>            |                      |     |
| Probenecid                                                     | 1.9E-05 M            | 0.6 |
| <b>OATP1B1 (h) inhibition (OATP1B1-CHO, FMTX substrate)</b>    |                      |     |
| Rifampicin                                                     | 2.2E-06 M            | 0.6 |
| <b>OATP1B3 (h) inhibition (OATP1B3-CHO, FMTX substrate)</b>    |                      |     |
| Rifampicin                                                     | 5.4E-06 M            | 0.4 |
| <b>P-gp inhibition (MDR1-MDCKII, calcein AM substrate)</b>     |                      |     |
| Verapamil                                                      | 3.1E-06 M            | 0.9 |

114

115 **Table S1:** In vitro DMPK analysis of transporter inhibition. As indicated in Table S1, several reference  
 116 compounds were included in the DMPK transporter inhibition analyses to demonstrate the functionality of the  
 117 transporter assay. The background for P-gp and BCRP is the mean reading in the presence of the highest  
 118 effective concentration of the reference inhibitor. The background for OATP1B1, OATP1B3, OAT1, OAT3, and  
 119 OCT2 is the mean reading in the absence of both the test compound and the substrate. For the efflux  
 120 transporters (P-gp and BCRP), increased fluorescence signal represents inhibition of the transporter activity.  
 121 For the uptake transporters (OATP1B1, OATP1B3, OAT1, OAT3, and OCT2), decreased fluorescence signal  
 122 represented inhibition of the transporter activity. The IC<sub>50</sub> values are shown for the analysed transporters with  
 123 the indicated substrate.

124

125

126

**Table S2.** In vitro DMPK analysis: CYP inhibition

127

| Assay   | Substrate        | Metabolite                     | Reference inhibitor |
|---------|------------------|--------------------------------|---------------------|
| CYP1A   | phenacetin       | acetaminophen                  | furafylline         |
| CYP2B6  | bupropion        | hydroxybupropion               | clopidogrel         |
| CYP2C8  | paclitaxel       | 6 $\alpha$ -hydroxypaclitaxel  | montelukast         |
| CYP2C9  | diclofenac       | 4'-hydroxydiclofenac           | sulfaphenazole      |
| CYP2C19 | omeprazole       | 5-hydroxyomeprazole            | oxybutynin          |
| CYP2D6  | dextromethorphan | dextrorphan                    | quinidine           |
| CYP3A   | midazolam        | 1-hydroxymidazolam             | Ketoconazole        |
| CYP3A   | testosterone     | 6 $\beta$ -hydroxytestosterone | Ketoconazole        |

| Reference Compound                                         | IC <sub>50</sub> (M) | nH  |
|------------------------------------------------------------|----------------------|-----|
| <b>CYP1A inhibition (HLM, phenacetin substrate)</b>        |                      |     |
| Furafylline                                                | 6.2E-06 M            | 0.9 |
| <b>CYP2B6 inhibition (HLM, bupropion substrate)</b>        |                      |     |
| Clopidogrel                                                | 7.4E-07 M            | 1.3 |
| <b>CYP2C8 inhibition (HLM, paclitaxel substrate)</b>       |                      |     |
| Montelukast                                                | 3.6E-06 M            | 0.8 |
| <b>CYP2C9 inhibition (HLM, diclofenac substrate)</b>       |                      |     |
| Sulfaphenazole                                             | 3.7E-07 M            | 0.8 |
| <b>CYP2C19 inhibition (HLM, omeprazole substrate)</b>      |                      |     |
| Oxybutynin                                                 | 5.5E-06 M            | 1.0 |
| <b>CYP2D6 inhibition (HLM, dextromethorphan substrate)</b> |                      |     |
| Quinidine                                                  | 1.2E-07 M            | 1.1 |
| <b>CYP3A inhibition (HLM, midazolam substrate)</b>         |                      |     |
| Ketoconazole                                               | 2.1E-07 M            | >3  |
| <b>CYP3A inhibition (HLM, testosterone substrate)</b>      |                      |     |
| Ketoconazole                                               | 2.7E-07 M            | >3  |

128

129

**Table S2:** In vitro DMPK analysis: CYP inhibition. As indicated in Table S2, several reference compounds were included in the DMPK transporter inhibition analyses to demonstrate the functionality of the CYP inhibition assay. The IC<sub>50</sub> values are shown for the analysed CYP's with the indicated inhibitors.

130

131

132

133

134

135

136

**Table S3.** In vitro DMPK analysis: CYP induction

| Positive control (conc.)     | Assay  |
|------------------------------|--------|
| Omeprazole (50 $\mu$ M)      | CYP1A  |
| Phenobarbital (1000 $\mu$ M) | CYP2B6 |



137

|     | Rifampin (10 $\mu$ M) | CYP3A |
|-----|-----------------------|-------|
| 138 |                       |       |
| 139 |                       |       |
| 140 |                       |       |
| 141 |                       |       |
| 142 |                       |       |
| 143 |                       |       |
| 144 |                       |       |
| 145 |                       |       |
| 146 |                       |       |
| 147 |                       |       |
| 148 |                       |       |
| 149 |                       |       |
| 150 |                       |       |
| 151 |                       |       |

**Table S3:** In vitro DMPK analysis: CYP induction. As indicated in Table S3, various compounds and substrates were applied as inducers of the investigated CYPs.

### References for supplementary materials

1. Bowers, A.K.J.; Chow, E.; Xu, H.; Dror, R.O.; Eastwood, M.P.; Gregersen, B.A.; Klepeis, J.L.; Kolossvary, I.; Moraes, M.A.; ., F.D.S., et al. Scalable algorithms for molecular dynamics simulations on commodity clusters. In Proceedings of Proceedings of the 2006 ACM/IEEE conference on Supercomputing, Tampa, Florida; pp. 84–es.
